# Supplementary material for: Bifunctional Pt–SnOx nanorods for enhanced oxygen reduction and hydrogen evolution reactions
Source: Royal Society of Chemistry journal article supplement (doi:10.1039/d1se00410g), 2021-01-01
Supplement: d1se00410g1.pdf [file d1se00410g1.pdf]

Bifunctional Pt-SnO<sub>x</sub> Nanorods for Enhanced Oxygen Reduction and Hydrogen Evolution Reactions

Tzu-Hsi Huang,<sup>a</sup> Dinesh Bhalothia,<sup>b</sup> Sheng Dai,<sup>c</sup> Che Yan,<sup>b</sup> Kuan-Wen Wang,<sup>a\*</sup> and Tsan-Yao Chen<sup>b,d,e\*</sup>

<sup>a</sup> Institute of Materials Science and Engineering, National Central University, Taoyuan City 32001, Taiwan

<sup>b</sup> School of Chemistry & Molecular Engineering, East China University of Science and Technology, Shanghai 200237, P.R. China

<sup>c</sup> Department of Engineering and System Science, National Tsing Hua University, Hsinchu 30013, Taiwan

<sup>d</sup> Department of Materials Science and Engineering, National Taiwan University of Science and Technology, Taipei 10617, Taiwan

<sup>e</sup> Hierarchical Green-Energy Materials (Hi-GEM) Research Centre, National Cheng Kung University, Tainan 70101, Taiwan

\*Corresponding Authors:

Tsan-Yao Chen

Email: [chencaeser@gmail.com](mailto:chencaeser@gmail.com)

Tel: +886-3-5715131 # 34271

FAX: +885-3-5720724

Kuan-Wen Wang

Email: [kuanwen.wang@gmail.com](mailto:kuanwen.wang@gmail.com)

Tel: +886-3-4227151 # 34906

**Table S1.** ICP-OES determined composition ratios and preparation process of experimental catalysts.

| Samples                 | Preparation Process | Morphology                          | Pt (at. %) | Sn (at. %) |
|-------------------------|---------------------|-------------------------------------|------------|------------|
| Pt-NRs                  | FAM method          | Pt Nanorods                         | 100        | 0          |
| Pt-SnO <sub>x</sub> NRs | FAM method          | SnO <sub>2</sub> capped Pt-nanorods | 81         | 19         |

**Table S2.** XRD determined structural parameters of experimental samples.

| Sample                  | d <sub>(hkl)</sub> (Å) |       |       | D <sub>(hkl)</sub> (nm) |       |       | H <sub>(111)</sub> /H <sub>(200)</sub><br>) | H <sub>(111)</sub> /H <sub>(220)</sub><br>) |
|-------------------------|------------------------|-------|-------|-------------------------|-------|-------|---------------------------------------------|---------------------------------------------|
|                         | (111)                  | (200) | (220) | (111)                   | (200) | (220) |                                             |                                             |
| J.M.-Pt/C               | 2.261                  | 1.966 | 1.380 | 3.82                    | 4.09  | 3.68  | 3.24                                        | 5.46                                        |
| Pt NRs                  | 2.265                  | 1.963 | 1.384 | 7.77                    | 4.64  | 4.54  | 2.95                                        | 5.88                                        |
| Pt-SnO <sub>x</sub> NRs | 2.254                  | 1.950 | 1.380 | 6.19                    | 5.36  | 5.51  | 2.73                                        | 5.05                                        |

\* d<sub>(hkl)\_Pt</sub> = lattice spacing

\* D<sub>(hkl)\_Pt</sub> = particle size

**Table S3 XPS analysis results for experimental samples and standards**

| Samples            | Catalysts               | Pt 4f <sub>7/2</sub> (eV) |               | Sn 3d <sub>3/2</sub> (eV) |        |
|--------------------|-------------------------|---------------------------|---------------|---------------------------|--------|
|                    |                         | Pt                        | Pt n+         | Sn 2+                     | Sn 4+  |
| Experiment samples | J.M.-Pt/C               | 71.07                     | 73.19         | N/A                       |        |
|                    | Pt NRs                  | 71.10                     | 73.32         |                           |        |
|                    | Pt-SnO <sub>x</sub> NRs | 70.50                     | 72.62         | 495.34                    | 496.01 |
| Standard*          | Pt                      | 70.90 – 71.10             | N/A           |                           |        |
|                    | PtO                     | N/A                       | 72.40 – 74.60 | N/A                       |        |
|                    | PtO <sub>2</sub>        |                           | 74.10 – 74.90 |                           |        |
|                    | PtOSn                   |                           | 72.30         |                           |        |
|                    | SnO                     | N/A                       |               | 495.37                    | N/A    |
|                    | SnO <sub>2</sub>        |                           |               | N/A                       | 494.50 |

\* Data obtained from the standard XPS data base of NIST website.

**Table S4.** Comparison of ORR activities of various low Pt loading catalysts.

| Samples                                            | Pt loading (wt.%) | Electrolyte                          | MA <sub>0.85</sub><br>(mA/mg <sub>Pt</sub> ) | Reference  |
|----------------------------------------------------|-------------------|--------------------------------------|----------------------------------------------|------------|
| Pt-SnO <sub>x</sub> NRs                            | 36                | 0.5 M HClO <sub>4</sub>              | 160                                          | This study |
| Pt 20s/SC CoO NRs                                  | 9.41              | 1.0 M KOH                            | 156                                          | 1          |
| 75% Pd <sub>80</sub> Co <sub>20</sub> +25% Pt      | 5                 | 0.5 M H <sub>2</sub> SO <sub>4</sub> | 150                                          | 2          |
| Pt/C                                               | 2.54              |                                      | 6.5                                          |            |
| Pt <sub>0.5</sub> Pd <sub>0.5</sub> /C             | 3.11              | 0.5 M H <sub>2</sub> SO <sub>4</sub> | 8.5                                          | 3          |
| Ag@Pt <sub>0.1</sub> Pd <sub>0.1</sub> /C          | 1.87              |                                      | 23.5                                         |            |
| H-Pt/CaMnO <sub>3</sub>                            | 8.06              | 0.1 M KOH                            | 380                                          | 4          |
| Pt/Na <sub>4</sub> Ge <sub>9</sub> O <sub>20</sub> | 4.97              | 0.1 M KOH                            | 380                                          | 5          |
|                                                    |                   | 0.1 M HClO <sub>4</sub>              | 150                                          |            |

**Table S5.** Comparison of HER activities of various low Pt loading catalysts.

| Samples                           | Pt loading<br>( $\mu\text{g}/\text{cm}^2$ ) | Electrolyte,<br>Scan rate                                     | $\eta^*$ (mV) @ 10<br>mA/cm <sup>2</sup> | References |
|-----------------------------------|---------------------------------------------|---------------------------------------------------------------|------------------------------------------|------------|
| Pt-SnO <sub>x</sub> NRs           | 351                                         | 0.5 M H <sub>2</sub> SO <sub>4</sub> , 2<br>mVs <sup>-1</sup> | 48                                       | This Study |
| Pt/MoS <sub>2</sub> /CFs          | 5.7                                         | 0.5 M H <sub>2</sub> SO <sub>4</sub> , 5<br>mVs <sup>-1</sup> | 80                                       | 6          |
| Pd <sub>60</sub> Pt <sub>40</sub> | 13                                          | 0.5 M H <sub>2</sub> SO <sub>4</sub> , 5<br>mVs <sup>-1</sup> | 130                                      | 7          |
| 5 ALD cycles Pt-WC                | 0.55                                        |                                                               | 438                                      |            |
| 10 ALD cycles Pt-WC               | 3.1                                         | 0.5 M H <sub>2</sub> SO <sub>4</sub> , 2<br>mVs <sup>-1</sup> | 408                                      | 8          |
| 30 ALD cycles Pt-WC               | 5.5                                         |                                                               | 306                                      |            |
| Pt/C                              | 25                                          |                                                               | 296                                      |            |
| Pt-MoS <sub>2</sub>               | 27                                          | 0.5 M H <sub>2</sub> SO <sub>4</sub> , 2<br>mVs <sup>-1</sup> | 80                                       | 9          |
| Pt-MoS <sub>2</sub>               | 18                                          | 0.1 M H <sub>2</sub> SO <sub>4</sub> , 2<br>mVs <sup>-1</sup> | 150                                      | 10         |

\*  $\eta$ : Overpotential

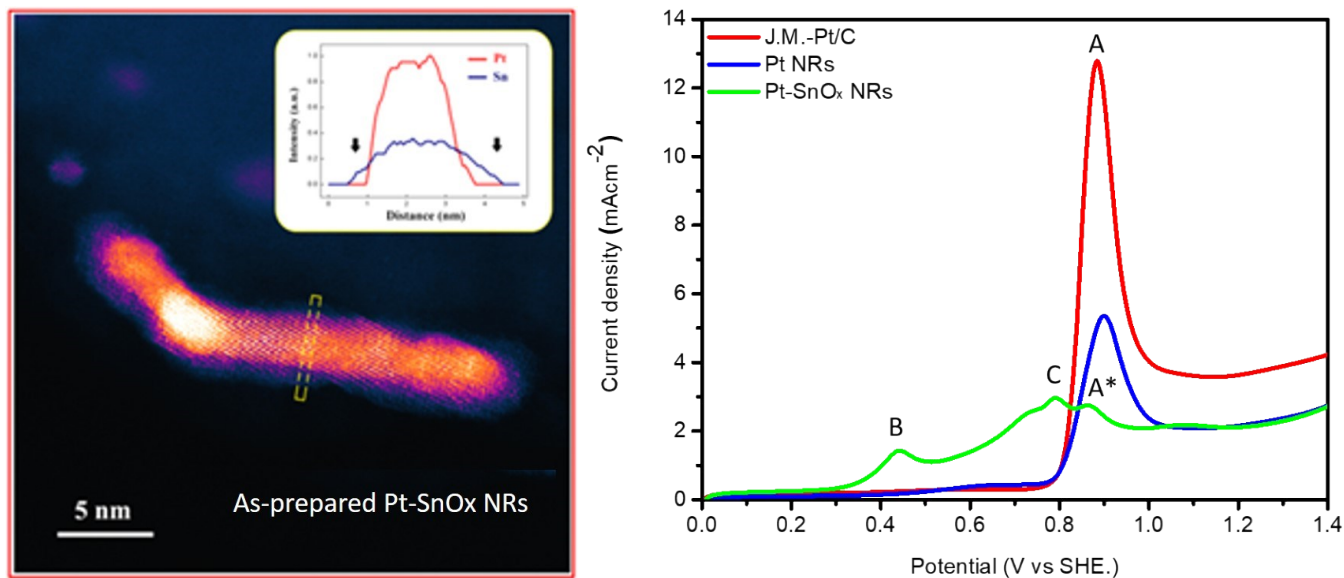

**Figure S1.** The high-angle annular dark-field scanning transmission electron microscopy (HAADF-STEM) of Pt-SnOx NR with Energy-dispersive X-ray spectroscopy (EDS) elemental mapping (right) and its CO stripping curve compared with that of J.M.-Pt/C and Pt NRs.

The high-angle annular dark-field scanning transmission electron microscopy (HAADF-STEM) of Pt-SnOx NR with Energy-dispersive X-ray spectroscopy (EDS) elemental mapping is presented in **Figure S6** and **Figure R1 (left)**. Accordingly, the Sn atoms are decorated in the Pt NR surface in Pt-SnOx NR. The **Figure R1 (right)** compares the CO stripping curves of commercial Pt catalyst (J.M.-Pt/C), Pt NRs and Pt-SnOx NRs. In this curve, peak A correspond to the current responses of CO oxidation in the Pt surface and the intensity corresponds to the specific surface area for chemical reaction. Compared to that of Pt NRs, the offset of peak A to A\* (by -0.02 V) reveals the reduction of energy barrier for CO oxidation due to the presence of Sn atoms neighboring to Pt atoms in the Pt-SnOx NR surface and the broad current density from 0.3 to 0.9 V vs. RHE is the CO oxidation current from Sn oxide surface (T. Matsui et al. / Journal of Power Sources 155 (2006) 152–156). In this region, the sharp current peaks B and C can be attributed to the characteristic reactions of Pt/Sn sites in different crystal facets of the Pt-SnOx NRs surface. Given that the redox reaction peaks for H<sub>2</sub> remaining exist in UPD<sub>H</sub> region (**Figure 5a**), the results of CO stripping curve and the EDX mapping analysis complementarily reveals the formation of SnOx decoration in the Pt-SnOx surface. Meanwhile, compared with that of Pt NR, a broad double layer region with higher current density (H<sub>DL</sub>) reveals the prevailing OH adsorption by SnOx, therefore, revealing the facilitation of ORR in hydration step in the Pt-SnOx NRs surface.

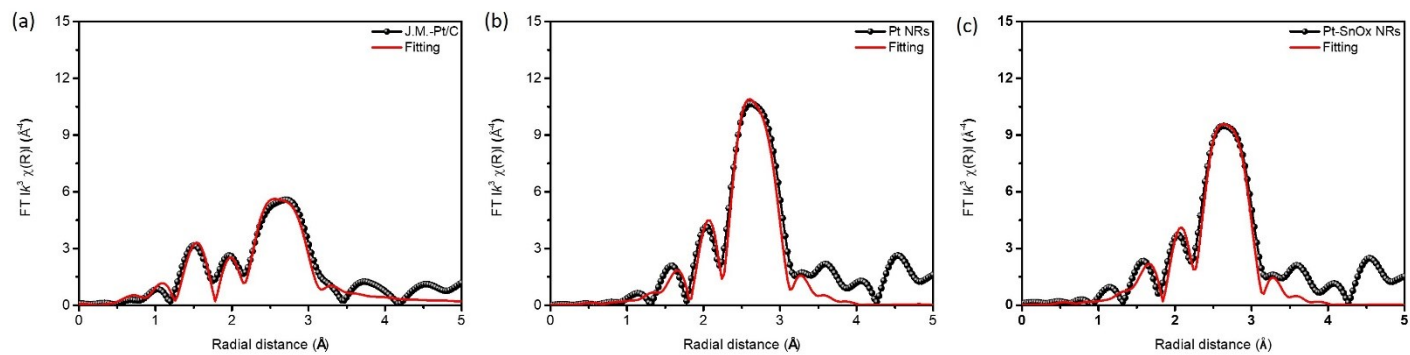

**Figure S2.** Model analysis fitting curves compared with experimental FT-EXAFS spectra at Pt L<sub>3</sub>-edge of (a) J.M.-Pt/C, (b) Pt NRs and (b) Pt-SnO<sub>x</sub> NRs.

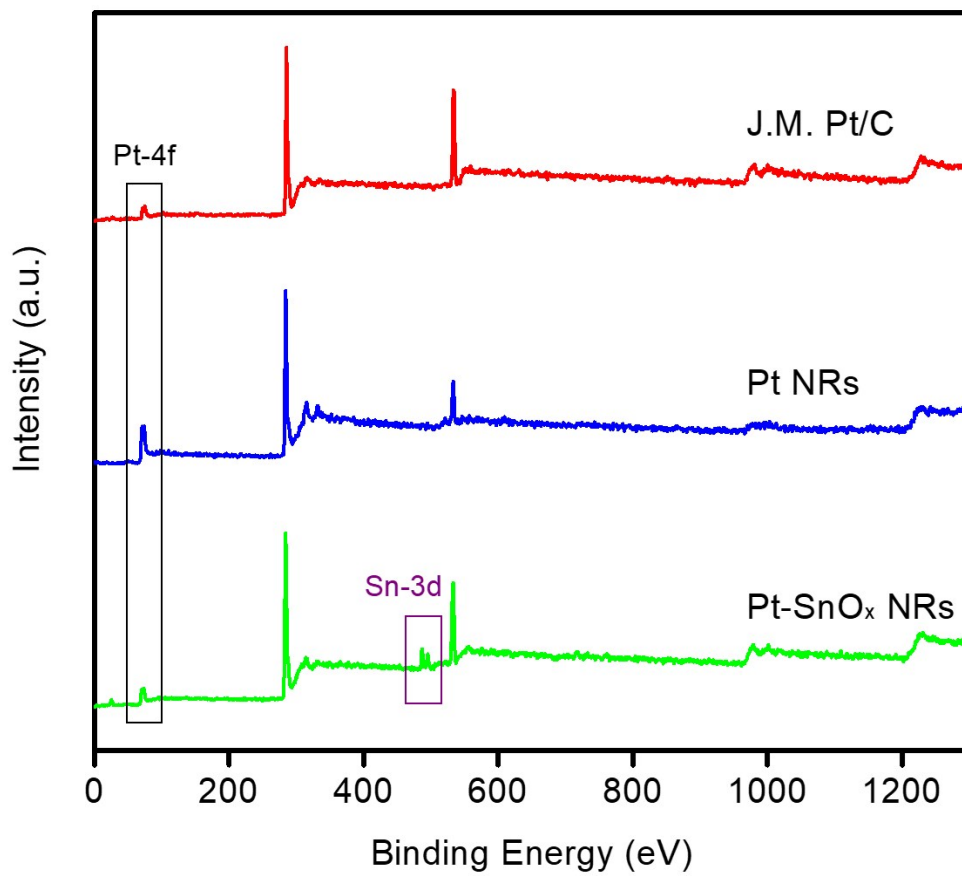

**Figure S3.** XPS survey spectra of J.M.-Pt/C, Pt NRs, and Pt-SnO<sub>x</sub> NRs catalysts. The black, and purple regions represent the core level spectra of Pt 4f, and Sn 3d, respectively.

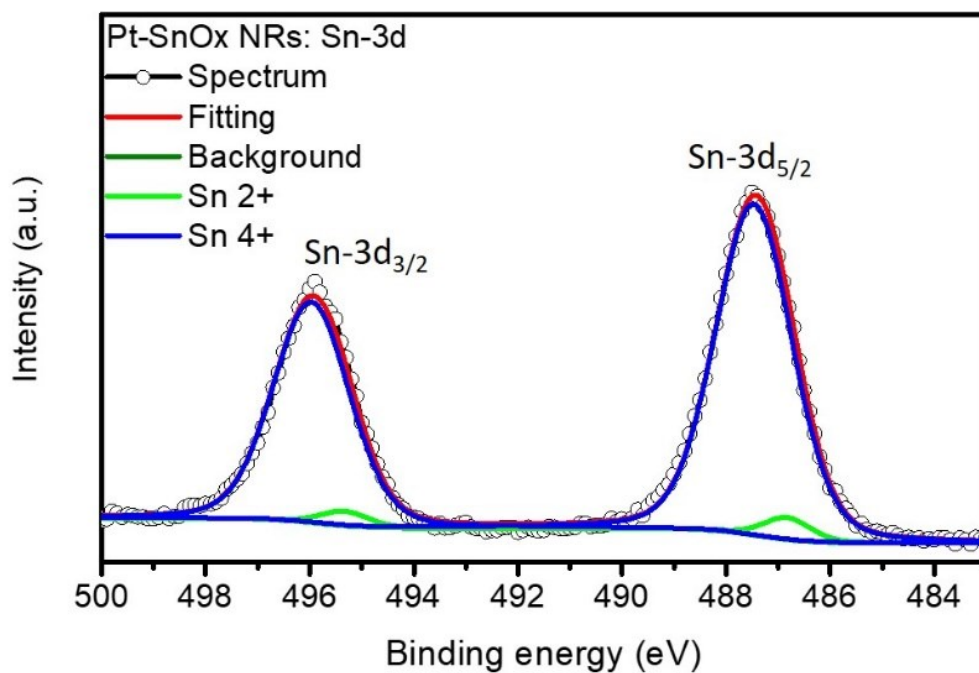

**Figure S4.** XPS spectra in the Sn-3d regions of the Pt-SnO<sub>x</sub> NRs.

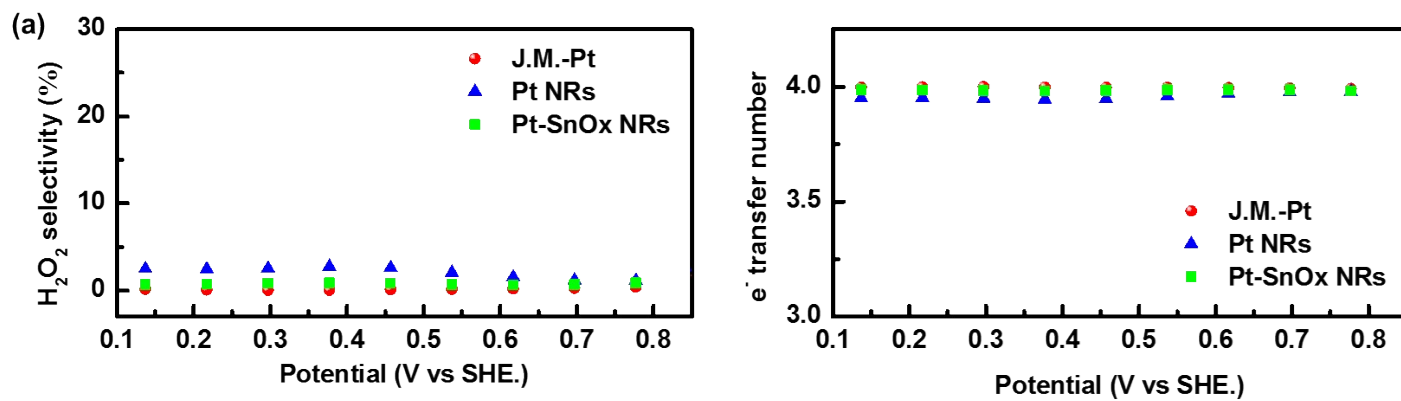

**Figure S5.** (a) The H<sub>2</sub>O<sub>2</sub> selectivity and (b) electron transfer number (*n*) of J.M.-Pt/C, Pt NRs, and Pt-SnO<sub>x</sub> NRs catalysts.

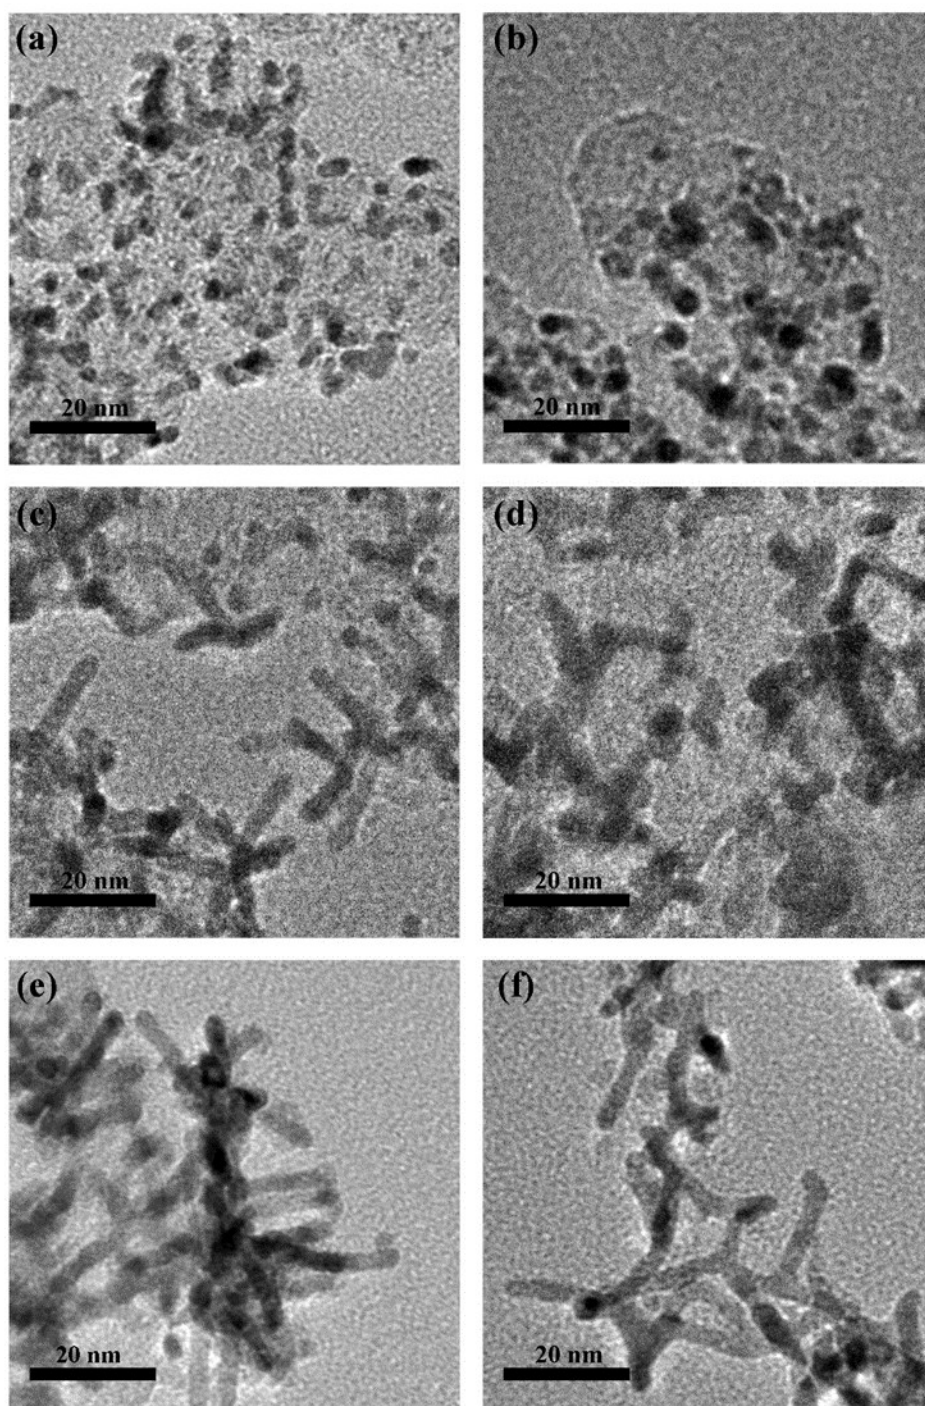

**Figure S6.** The morphologies of as-prepared (a) J.M.-Pt/C, (c) Pt NRs, and (e) Pt-SnOx NRs catalysts, and (b) J.M.-Pt/C, (d) Pt NRs, and (f) Pt-SnOx NRs after ADT.



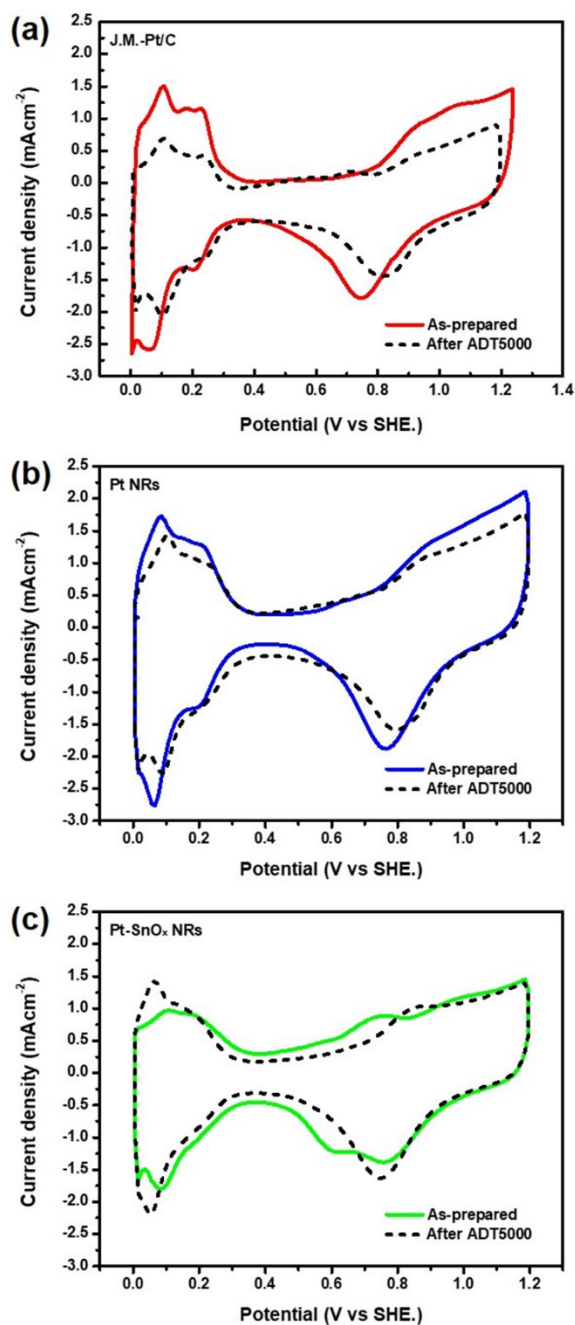

**Figure S7.** CV curve before and after ADT for (a) J.M.-Pt/C, (b) Pt NRs, and (c) Pt-SnO<sub>x</sub> NRs in N<sub>2</sub>-saturated 0.5 M HClO<sub>4</sub> solution at room temperature.

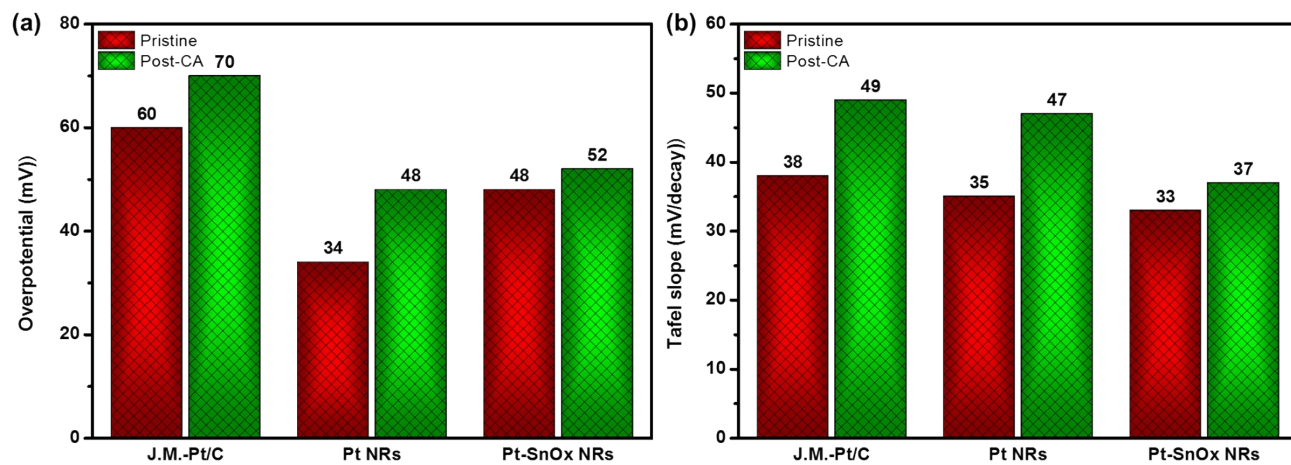

**Figure S8.** Pristine and after CA for 10 hours. (a) overpotentials and (b) Tafel slopes of J.M.-Pt/C, Pt NRs, and Pt-SnO<sub>x</sub> NRs.

## References

1. C. Meng, T. Ling, T.-Y. Ma, H. Wang, Z. Hu, Y. Zhou, J. Mao, X.-W. Du, M. Jaroniec and S.-Z. Qiao, *Advanced Materials*, 2017, **29**, 1604607.
2. A. Sarkar, A. V. Murugan and A. Manthiram, *Langmuir*, 2010, **26**, 2894-2903.
3. I. E. Pech-Pech, D. F. Gervasio, A. Godínez-García, O. Solorza-Feria and J. F. Pérez-Robles, *Journal of Power Sources*, 2015, **276**, 365-373.
4. X. Han, F. Cheng, T. Zhang, J. Yang, Y. Hu and J. Chen, *Advanced Materials*, 2014, **26**, 2047-2051.
5. X. Zhou, L. Chen, G. Wan, Y. Chen, Q. Kong, H. Chen and J. Shi, *ChemSusChem*, 2016, **9**, 2337-2342.
6. D. Hou, W. Zhou, X. Liu, K. Zhou, J. Xie, G. Li and S. Chen, *Electrochimica Acta*, 2015, **166**, 26-31.
7. R. Ojani, J. B. Raoof and E. Hasheminejad, *International Journal of Hydrogen Energy*, 2013, **38**, 92-99.
8. I. J. Hsu, Y. C. Kimmel, X. Jiang, B. G. Willis and J. G. Chen, *Chemical Communications*, 2012, **48**, 1063-1065.
9. X. Huang, Z. Zeng, S. Bao, M. Wang, X. Qi, Z. Fan and H. Zhang, *Nature Communications*, 2013, **4**, 1444.
10. J. Deng, H. Li, J. Xiao, Y. Tu, D. Deng, H. Yang, H. Tian, J. Li, P. Ren and X. Bao, *Energy & Environmental Science*, 2015, **8**, 1594-1601.
